# Supplementary material for: Dynamics of influenza A virus infections in permanently infected pig farms: evidence of recurrent infections, circulation of several swine influenza viruses and reassortment events
Source: PubMed Central journal article supplement (PMC3846378; doi:10.1186/1297-9716-44-72), 2013-09-04

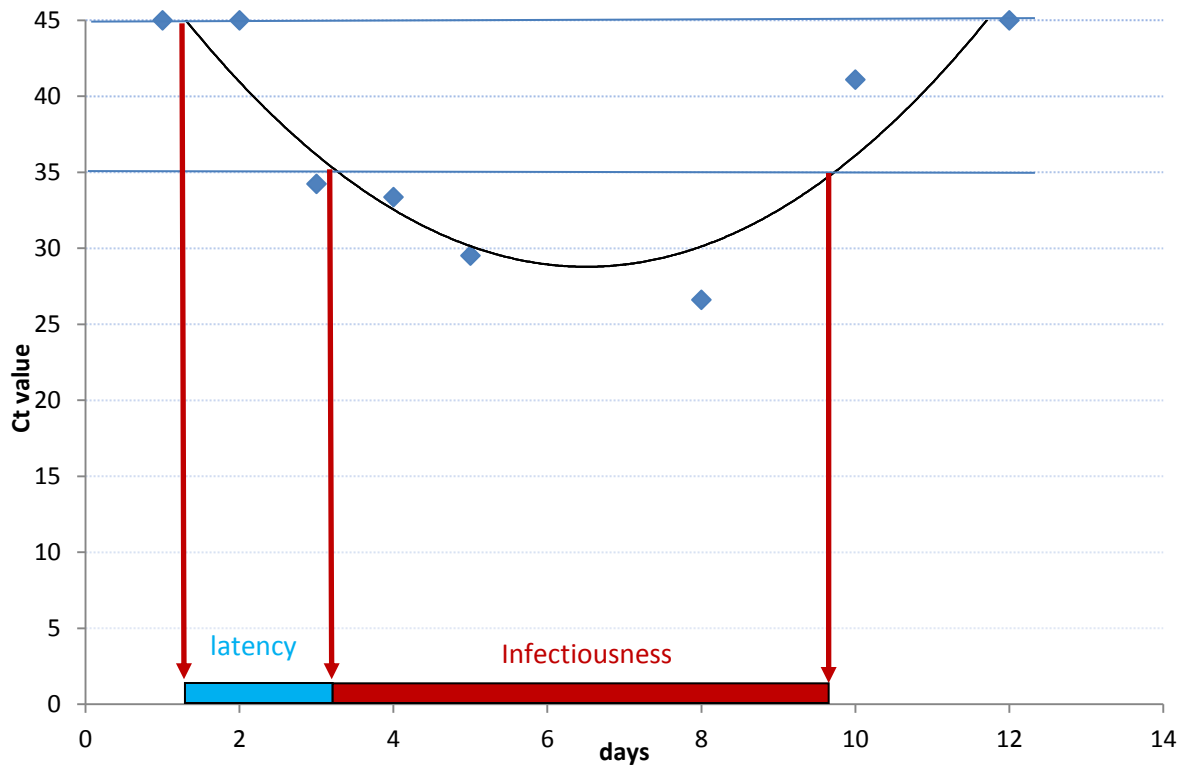

Supplement: 1297-9716-44-72-S1.pdf [file 1297-9716-44-72-S1.pdf]
